# Supplementary material for: Spectroscopical Investigations on the Redox Chemistry of [FeFe]-Hydrogenases in the Presence of Carbon Monoxide
Source: PubMed Central journal article supplement (PMC6100070; doi:10.3390/molecules23071669), 2018-07-09
Supplement: molecules-23-01669-s001.pdf [file molecules-23-01669-s001.pdf]

## Supporting Information

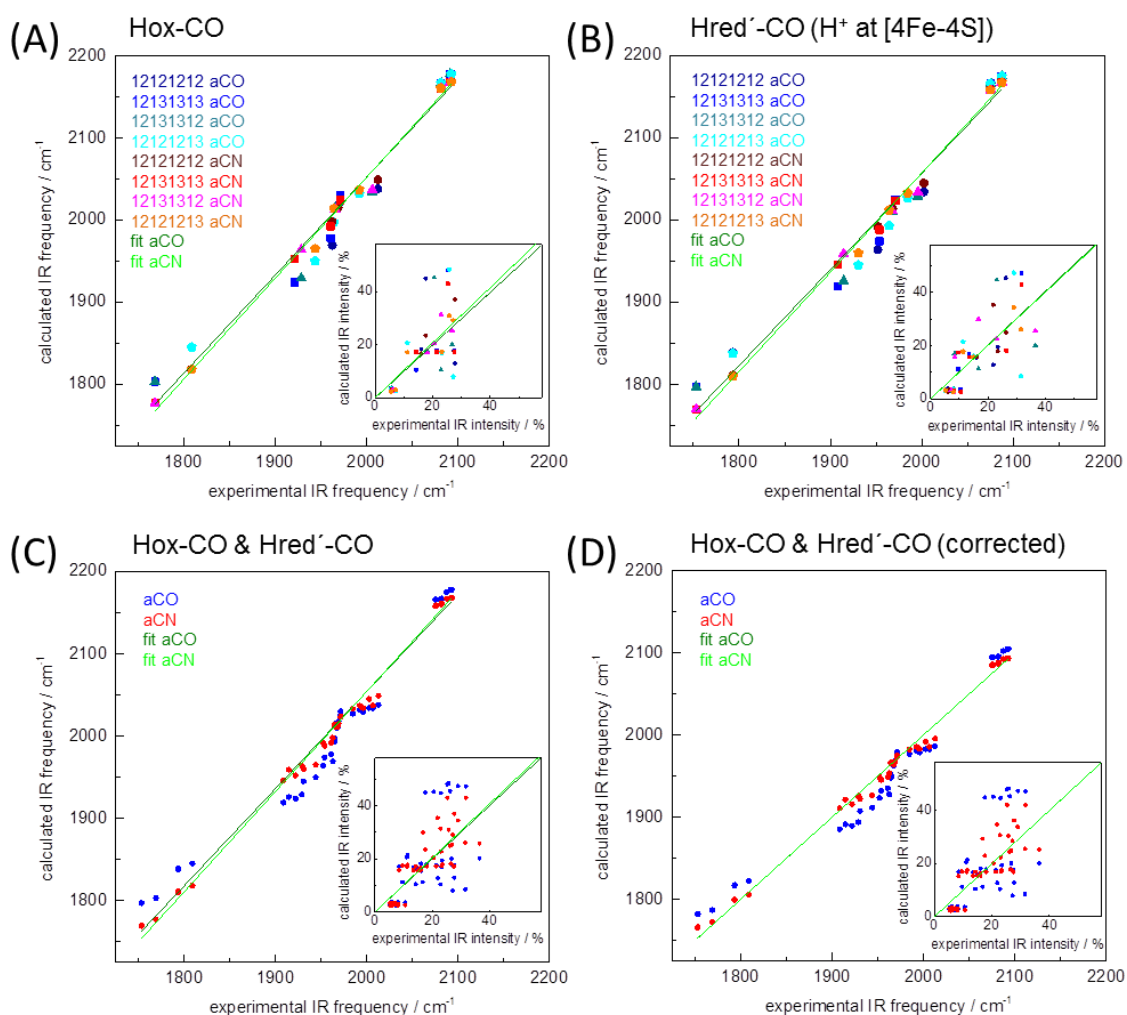

**Figure S1 - Correlations of experimental and calculated IR data.** DFT models: aCO, apical CO ligand at Fe<sub>a</sub>; aCN, apical CN ligand at Fe<sub>a</sub>. Data stem from Table S1 for the indicated CO labeling patterns of the H-cluster (p μ d1 d2), lines show linear regressions with parameters in Table S2 for fits of IR frequency and intensity (inset) data of the CO/CN ligands for Hox-CO (A), Hred'-CO (including a proton at the [4Fe-4S] cluster) (B), or all CO labeling data of both states (C). In (D), DFT data corrected (Eq. 1) for systematic deviations from ideal correlation (i.e. offset = 0, slope = 1) are shown for all CO labeling data of both states.

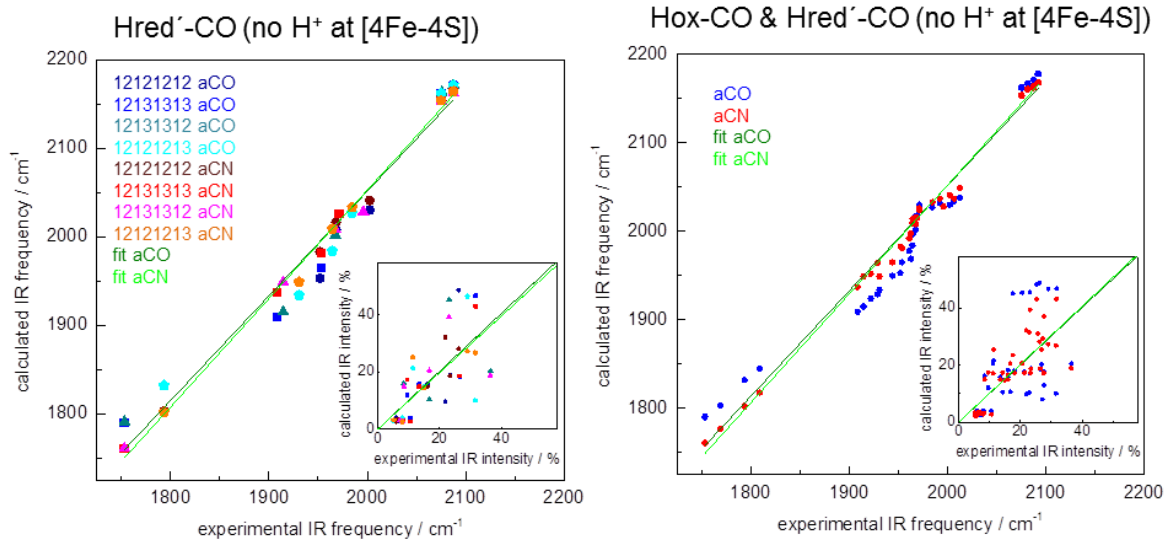

**Figure S2 - Correlations for Hred'-CO without [4Fe-4S] cluster protonation.** Annotations as in Fig. S3. The proton at the [4Fe-4S] cluster in Hred'-CO was omitted in the structures.

**Table S1:** Experimental and calculated IR frequencies and intensities.<sup>a</sup>

| state                       | ligand | EXP                              |          |          |          | DFT                 |          |          |          |                     |          |          |          |      |
|-----------------------------|--------|----------------------------------|----------|----------|----------|---------------------|----------|----------|----------|---------------------|----------|----------|----------|------|
|                             |        |                                  |          |          |          | aCO model structure |          |          |          | aCN model structure |          |          |          |      |
|                             |        | CO labeling pattern (p μ d1 d2)  |          |          |          |                     |          |          |          |                     |          |          |          |      |
|                             |        | 12121212                         | 12121213 | 12131313 | 12131312 | 12121212            | 12121213 | 12131313 | 12131312 | 12121212            | 12121213 | 12131313 | 12131312 |      |
| Hox-CO                      |        | IR frequency [cm <sup>-1</sup> ] |          |          |          |                     |          |          |          |                     |          |          |          |      |
|                             |        | CO                               | 1808     | 1808     | 1768     | 1768                | 1845     | 1845     | 1803     | 1803                | 1818     | 1818     | 1777     | 1777 |
|                             |        |                                  | 1962     | 1942     | 1920     | 1927                | 1969     | 1929     | 1924     | 1950                | 1998     | 1965     | 1952     | 1965 |
|                             |        |                                  | 1968     | 1964     | 1960     | 1964                | 2018     | 2015     | 1978     | 1997                | 2015     | 2013     | 1992     | 2014 |
|                             |        |                                  | 2012     | 1991     | 1972     | 2006                | 2038     | 2035     | 2030     | 2031                | 2049     | 2038     | 2024     | 2036 |
|                             |        | CN                               | 2082     | 2082     | 2082     | 2082                | 2167     | 2167     | 2167     | 2167                | 2161     | 2161     | 2160     | 2161 |
|                             |        |                                  | 2092     | 2092     | 2092     | 2092                | 2178     | 2178     | 2178     | 2178                | 2168     | 2168     | 2168     | 2168 |
|                             |        | normalized IR intensity [%]      |          |          |          |                     |          |          |          |                     |          |          |          |      |
|                             |        | CO                               | 29       | 25       | 28       | 25                  | 18       | 18       | 18       | 17                  | 17       | 17       | 17       | 17   |
|                             |        |                                  | 16       | 15       | 16       | 26                  | 18       | 20       | 18       | 20                  | 17       | 25       | 17       | 17   |
|                             |        |                                  | 17       | 15       | 30       | 16                  | 45       | 45       | 48       | 49                  | 23       | 20       | 43       | 31   |
|                             |        |                                  | 28       | 27       | 11       | 20                  | 13       | 11       | 10       | 8                   | 37       | 32       | 17       | 29   |
|                             |        | CN                               | 4        | 7        | 6        | 6                   | 3        | 3        | 3        | 3                   | 3        | 3        | 3        | 3    |
|                             |        |                                  | 5        | 12       | 9        | 7                   | 4        | 4        | 3        | 4                   | 2        | 2        | 2        | 2    |
| Hred'-CO (+H <sup>+</sup> ) |        | IR frequency [cm <sup>-1</sup> ] |          |          |          |                     |          |          |          |                     |          |          |          |      |
|                             |        | CO                               | 1793     | 1793     | 1753     | 1753                | 1839     | 1839     | 1797     | 1797                | 1811     | 1810     | 1769     | 1770 |
|                             |        |                                  | 1951     | 1930     | 1906     | 1914                | 1964     | 1926     | 1919     | 1945                | 1992     | 1959     | 1946     | 1960 |
|                             |        |                                  | 1967     | 1962     | 1953     | 1962                | 2013     | 2010     | 1974     | 1993                | 2014     | 2011     | 1988     | 2012 |
|                             |        |                                  | 2002     | 1984     | 1964     | 1996                | 2034     | 2030     | 2025     | 2026                | 2045     | 2035     | 2023     | 2033 |
|                             |        | CN                               | 2076     | 2076     | 2076     | 2076                | 2166     | 2166     | 2166     | 2166                | 2159     | 2158     | 2158     | 2158 |
|                             |        |                                  | 2086     | 2086     | 2086     | 2086                | 2175     | 2175     | 2175     | 2175                | 2167     | 2167     | 2167     | 2167 |
|                             |        | normalized IR intensity [%]      |          |          |          |                     |          |          |          |                     |          |          |          |      |
|                             |        | CO                               | 14       | 17       | 19       | 14                  | 16       | 17       | 17       | 16                  | 16       | 16       | 16       | 16   |
|                             |        |                                  | 26       | 17       | 17       | 39                  | 19       | 20       | 18       | 21                  | 18       | 26       | 18       | 18   |
|                             |        |                                  | 21       | 21       | 38       | 11                  | 45       | 44       | 47       | 48                  | 25       | 23       | 43       | 35   |
|                             |        |                                  | 25       | 35       | 11       | 20                  | 13       | 12       | 11       | 8                   | 35       | 30       | 17       | 26   |
|                             |        | CN                               | 5        | 4        | 7        | 7                   | 3        | 3        | 3        | 3                   | 3        | 3        | 3        | 3    |
|                             |        |                                  | 9        | 5        | 9        | 9                   | 4        | 4        | 4        | 4                   | 3        | 3        | 3        | 3    |
| Hred'-CO (-H <sup>+</sup> ) |        | IR frequency [cm <sup>-1</sup> ] |          |          |          |                     |          |          |          |                     |          |          |          |      |
|                             |        | CO                               | 1793     | 1793     | 1753     | 1753                | 1832     | 1832     | 1790     | 1786                | 1803     | 1802     | 1761     | 1761 |
|                             |        |                                  | 1951     | 1930     | 1906     | 1914                | 1953     | 1915     | 1909     | 1930                | 1983     | 1951     | 1937     | 1949 |
|                             |        |                                  | 1967     | 1962     | 1953     | 1962                | 2008     | 2003     | 1965     | 1979                | 2016     | 2009     | 1981     | 2009 |
|                             |        |                                  | 2002     | 1984     | 1964     | 1996                | 2030     | 2029     | 2026     | 2017                | 2041     | 2031     | 2026     | 2032 |
|                             |        | CN                               | 2076     | 2076     | 2076     | 2076                | 2162     | 2162     | 2162     | 2163                | 2154     | 2154     | 2154     | 2154 |
|                             |        |                                  | 2086     | 2086     | 2086     | 2086                | 2171     | 2171     | 2171     | 2168                | 2164     | 2164     | 2164     | 2164 |
|                             |        | normalized IR intensity [%]      |          |          |          |                     |          |          |          |                     |          |          |          |      |
|                             |        | CO                               | 14       | 17       | 19       | 14                  | 16       | 16       | 16       | 16                  | 15       | 15       | 15       | 15   |
|                             |        |                                  | 26       | 17       | 17       | 39                  | 19       | 20       | 18       | 20                  | 19       | 19       | 19       | 19   |
|                             |        |                                  | 21       | 21       | 38       | 11                  | 49       | 46       | 47       | 46                  | 28       | 40       | 43       | 40   |
|                             |        |                                  | 25       | 35       | 11       | 20                  | 10       | 11       | 12       | 11                  | 32       | 21       | 18       | 21   |
|                             |        | CN                               | 5        | 4        | 7        | 7                   | 3        | 3        | 3        | 3                   | 3        | 3        | 3        | 3    |
|                             |        |                                  | 9        | 5        | 9        | 9                   | 4        | 4        | 4        | 4                   | 3        | 3        | 3        | 3    |

<sup>a</sup>For Hred'-CO, structures with (+H<sup>+</sup>) or without (-H<sup>+</sup>) a proton at the [4Fe-4S] cluster were considered.

**Table S2:** Fit parameters of IR frequency and intensity correlations.<sup>a</sup>

| state                                | parameter    | DFT structure              |          |                |                            |         |                |
|--------------------------------------|--------------|----------------------------|----------|----------------|----------------------------|---------|----------------|
|                                      |              | aCO                        |          |                | aCN                        |         |                |
|                                      |              | offset [cm <sup>-1</sup> ] | slope    | R <sup>2</sup> | offset [cm <sup>-1</sup> ] | slope   | R <sup>2</sup> |
| Hox-CO                               | IR frequency | -338(96)                   | 1.20(5)  | 0.964          | -409(38)                   | 1.22(2) | 0.995          |
| Hred'-CO (+H <sup>+</sup> )          |              | -283(91)                   | 1.17(5)  | 0.965          | -361(35)                   | 1.21(2) | 0.995          |
| Hred'-CO (-H <sup>+</sup> )          |              | -314(98)                   | 1.18(6)  | 0.961          | -398(37)                   | 1.23(2) | 0.994          |
|                                      |              | offset [%]                 | slope    | R <sup>2</sup> | offset [%]                 | slope   | R <sup>2</sup> |
| Hox-CO                               | IR intensity | 0                          | 0.99(14) | 0.319          | 0                          | 1.04(7) | 0.728          |
| Hred'-CO (+H <sup>+</sup> )          |              | 0                          | 1.01(12) | 0.461          | 0                          | 1.00(7) | 0.667          |
| Hred'-CO (-H <sup>+</sup> )          |              | 0                          | 1.01(13) | 0.457          | 0                          | 0.99(9) | 0.583          |
|                                      |              | offset [cm <sup>-1</sup> ] | slope    | R <sup>2</sup> | offset [cm <sup>-1</sup> ] | slope   | R <sup>2</sup> |
| Hox-CO & Hred'-CO (+H <sup>+</sup> ) | IR frequency | -307(66)                   | 1.18(4)  | 0.964          | -382(27)                   | 1.21(2) | 0.995          |
| Hox-CO & Hred'-CO (-H <sup>+</sup> ) |              | -326(68)                   | 1.19(4)  | 0.963          | -403(26)                   | 1.23(2) | 0.994          |
|                                      |              | offset [%]                 | slope    | R <sup>2</sup> | offset [%]                 | slope   | R <sup>2</sup> |
| Hox-CO & Hred'-CO (+H <sup>+</sup> ) | IR intensity | 0                          | 1.00(9)  | 0.388          | 0                          | 1.02(5) | 0.697          |
| Hox-CO & Hred'-CO (-H <sup>+</sup> ) |              | 0                          | 1.00(10) | 0.389          | 0                          | 1.01(5) | 0.654          |
|                                      |              | offset [cm <sup>-1</sup> ] | slope    | R <sup>2</sup> | offset [cm <sup>-1</sup> ] | slope   | R <sup>2</sup> |
| Hred'-CO (+H <sup>+</sup> ) – Hox-CO | IR frequency | -2.5(6)                    | 0.11(6)  | 0.124          | -0.4(4)                    | 0.32(4) | 0.781          |
| Hred'-CO (-H <sup>+</sup> ) – Hox-CO | difference   | -4.0(1.1)                  | 0.21(11) | 0.106          | 0.3(7)                     | 0.66(8) | 0.755          |

<sup>a</sup>Data refer to linear regressions ( $F_{I,cal} = \text{offset}_{F,I} + \text{slope}_{F,I} \times F_{I,exp}$ ) to data points in Figs. S1 and S2 (aCO/aCN, apical CO or CN ligand at Fe<sub>a</sub>). Annotations +/-H<sup>+</sup> for Hred'-CO refer to the presence or absence of a proton at the [4Fe-4S] cluster. Values for IR frequency differences refer to corrected data (Eq. 1). Values for experimental and computational IR frequency differences were derived from data in Table S1 and shown values refer to linear regression analysis.

**Table S3:** Root-mean square deviations for IR data of **Hox-CO** and **Hred'-CO**.<sup>a</sup>

| state                       | model structure | parameter | CO labeling pattern (p μ d1 d2) |                |                |                | mean |
|-----------------------------|-----------------|-----------|---------------------------------|----------------|----------------|----------------|------|
|                             |                 |           | 12 12 12<br>12                  | 12 12 12<br>13 | 12 13 13<br>13 | 12 13 13<br>12 |      |
| Hox-CO                      |                 |           | rmsd [cm <sup>-1</sup> ]        |                |                |                |      |
|                             | aCO             | IR        | 20                              | 18             | 20             | 20             | 20   |
|                             | aCN             | frequency | 8                               | 8              | 7              | 9              | 8    |
|                             |                 |           | rmsd [%]                        |                |                |                |      |
|                             | aCO             | IR        | 13                              | 13             | 10             | 12             | 12   |
|                             | aCN             | intensity | 6                               | 5              | 9              | 4              | 6    |
| Hred'-CO (+H <sup>+</sup> ) |                 |           | rmsd [cm <sup>-1</sup> ]        |                |                |                |      |
|                             | aCO             | IR        | 20                              | 18             | 20             | 19             | 19   |
|                             | aCN             | frequency | 7                               | 6              | 8              | 8              | 7    |
|                             |                 |           | rmsd [%]                        |                |                |                |      |
|                             | aCO             | IR        | 9                               | 13             | 8              | 12             | 11   |
|                             | aCN             | intensity | 6                               | 5              | 8              | 8              | 7    |
| Hred'-CO (-H <sup>+</sup> ) |                 |           | rmsd [cm <sup>-1</sup> ]        |                |                |                |      |
|                             | aCO             | IR        | 21                              | 20             | 22             | 20             | 21   |
|                             | aCN             | frequency | 8                               | 7              | 8              | 8              | 8    |
|                             |                 |           | rmsd [%]                        |                |                |                |      |
|                             | aCO             | IR        | 11                              | 12             | 8              | 12             | 11   |
|                             | aCN             | intensity | 5                               | 6              | 7              | 11             | 7    |

<sup>a</sup>rmsd was calculated (Eq. 2) from experimental IR frequencies and normalized intensities (Table S1) and IR data from DFT corrected for systematic deviations ( $F/I_{\text{cor}}$ , Eq. 1). Data for DFT models with an apical CO (aCO) or CN (aCN) at Fe<sub>a</sub> are compared (+/-H<sup>+</sup>, with/without H<sup>+</sup> at [4Fe-4S]).

**Table S4:** Relative probability of H-cluster structures.<sup>a</sup>

| state                       | structure                |      |
|-----------------------------|--------------------------|------|
|                             | aCO                      | aCN  |
|                             | relative probability [%] |      |
| Hox-CO                      | 3±2                      | 97±2 |
| Hred'-CO (+H <sup>+</sup> ) | 12±6                     | 96±4 |
| Hred'-CO (-H <sup>+</sup> ) | 7±7                      | 86±6 |

<sup>a</sup>Probabilities (±standard deviation) were calculated using Eq. 3 and represent the mean values for respective R<sup>2</sup> (from IR frequency and intensity correlations; Figs. S1 and S2) and rmsd (Table S3) values.
